# Supplementary material for: Theoretical study on stability and ion transport property with halide doping of Na3SbS4 electrolyte for all-solid-state batteries
Source: Royal Society of Chemistry journal article supplement (doi:10.1039/d1ta07292g), 2021-12-01
Supplement: d1ta07292g1.pdf [file d1ta07292g1.pdf]

**Theoretical study on stability and ion transport property with halide doping of Na<sub>3</sub>SbS<sub>4</sub> electrolyte for all-solid-state battery**

**Randy Jalem<sup>a,b,c,\*</sup>, Bo Gao,<sup>a</sup> Hong-Kang Tian,<sup>a</sup> and Yoshitaka Tateyama<sup>a,c,\*</sup>**

<sup>a</sup>Center for Green Research on Energy and Environmental Materials (GREEN), National Institute for Materials Science (NIMS), Tsukuba, Japan. E-mail: JALEM.Randy@nims.go.jp; Tel: +81-029-8604636 (ex. 4636).

<sup>b</sup>PRESTO, Japan Science and Technology Agency (JST), Saitama, Japan.

<sup>c</sup>Elements Strategy Initiative for Catalysts & Batteries, Kyoto University, Kyoto, Japan.

Table S1. Comparison of DFT lattice parameters with tetragonal Na<sub>3</sub>SbS<sub>4</sub> as the initial structure for undoped and doped models.

| Composition                                                       | Initial structure      | a <sub>1</sub> / Å | a <sub>2</sub> / Å | a <sub>3</sub> / Å | a <sub>3</sub> /a <sub>1</sub> | a <sub>3</sub> /a <sub>2</sub> |
|-------------------------------------------------------------------|------------------------|--------------------|--------------------|--------------------|--------------------------------|--------------------------------|
| Na <sub>3</sub> SbS <sub>4</sub>                                  | Tetragonal (unit cell) | 7.2207             | 7.2207             | 7.3729             | 1.0211                         | 1.0211                         |
| Na <sub>2.8750</sub> SbS <sub>3.8750</sub> Cl <sub>0.1250</sub>   | Tetragonal (2x2x2)     | 7.2430             | 7.2574             | 7.3682             | 1.0173                         | 1.0153                         |
| Na <sub>2.9375</sub> SbS <sub>3.9375</sub> Cl <sub>0.0625</sub> * | -                      | 7.176              | 7.176              | 7.183              | 1.0001                         | 1.0001                         |

\*Experimental data (F. Tsuji et al., J. Ceram. Soc. Jpn 2020, 128, 641-647).

Table S2. Comparison between DFT results (in this work) and experiment (in parenthesis, based from Ref. 33 of main text) for the structural information of t-Na<sub>3</sub>SbS<sub>4</sub>.

| Atom pair | Bond distance / Å | %diff. |
|-----------|-------------------|--------|
| Na1-S(1)  | 2.91 (2.87)       | 1.3    |
| Na1-S(2)  | 2.91 (2.87)       | 1.3    |
| Na1-S(3)  | 3.04 (3.02)       | 0.7    |
| Na1-S(4)  | 3.04 (3.02)       | 0.7    |
| Na1-S(5)  | 3.10 (3.06)       | 1.3    |
| Na1-S(6)  | 3.10 (3.06)       | 1.3    |
| Na2-S(1)  | 3.04 (3.01)       | 1.3    |
| Na2-S(2)  | 3.04 (3.01)       | 1.3    |
| Na2-S(3)  | 3.04 (3.01)       | 1.3    |
| Na2-S(4)  | 3.04 (3.01)       | 1.3    |
| Na2-S(5)  | 3.45 (3.42)       | 0.8    |
| Na2-S(6)  | 3.45 (3.42)       | 0.8    |
| Sb-S      | 2.36 (2.31)       | 2.3    |

Table S3. Variation of DFT-calculated lattice constants with halide anion doping on c-Na<sub>3</sub>SbS<sub>4</sub>.

| DFT Composition                                              | Ave. lattice constant / Å (GGA-PBE @0 K) | %diff. (undoped vs. doped) |
|--------------------------------------------------------------|------------------------------------------|----------------------------|
| c-Na <sub>3</sub> SbS <sub>4</sub> (cubic)                   | 7.2466                                   | -                          |
| Na <sub>2.875</sub> SbS <sub>3.875</sub> F <sub>0.125</sub>  | 7.2775                                   | 0.43                       |
| Na <sub>2.875</sub> SbS <sub>3.875</sub> Cl <sub>0.125</sub> | 7.2900                                   | 0.60                       |
| Na <sub>2.875</sub> SbS <sub>3.875</sub> Br <sub>0.125</sub> | 7.2887                                   | 0.58                       |
| Na <sub>2.875</sub> SbS <sub>3.875</sub> I <sub>0.125</sub>  | 7.3100                                   | 0.87                       |

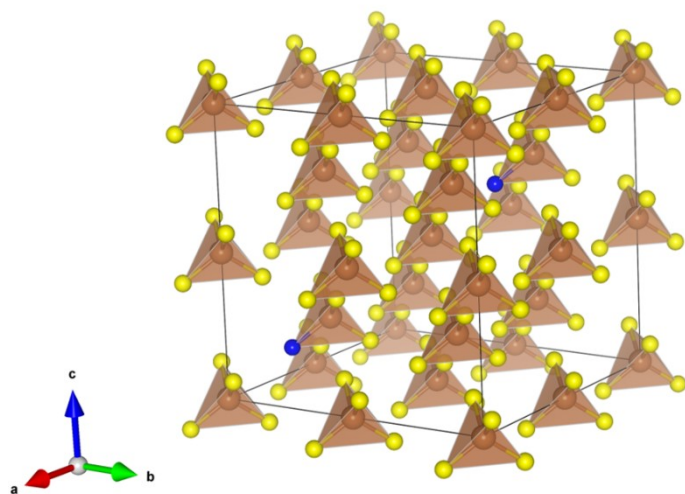

Figure S1. Schematic illustration of  $2 \times 2 \times 2$   $\text{Na}_3\text{SbS}_4$  supercell model showing the  $\text{SbS}_4$  tetrahedral units (brown) and 2 S sites substituted by halide dopant atoms (blue).

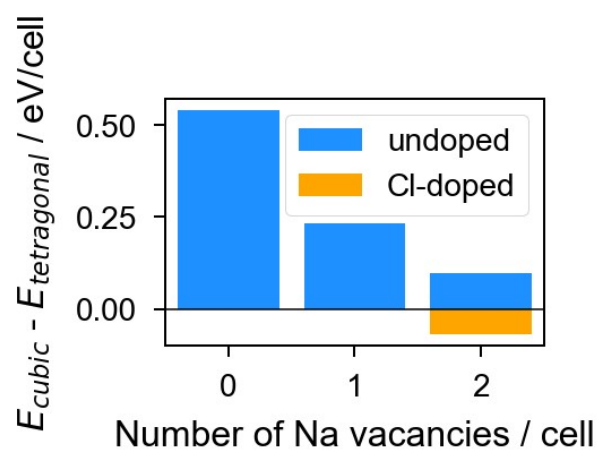

Figure S2. DFT energy difference between cubic and tetragonal structure as a function of number of vacancies. At each cell with a given number of Na vacancies (i.e., 1, and 2), a structure configuration sampling was performed followed by DFT geometry optimization (10 undoped tetragonal structures, 10 undoped cubic structures, 5 Cl-doped tetragonal structures, and 5 Cl-doped cubic structures). The lowest-energy structures for each cases were taken for the calculation of the energy difference between the cubic and tetragonal structure (i.e.,  $E_{\text{cubic}} - E_{\text{tetragonal}} / \text{eV/cell}$ ).

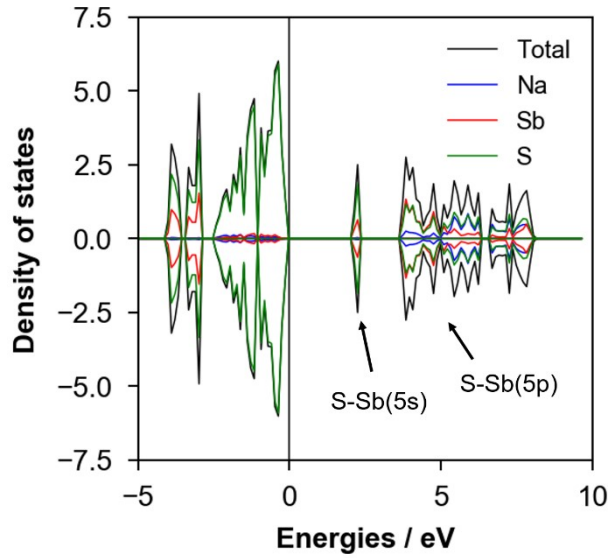

Figure S3. DFT-calculated total and partial density of states (DOS) of  $t\text{-Na}_3\text{SbS}_4$  ( $P42_1c$ ).

Table S4. Various phases in the Na-Sb-S system and their DFT-calculated formation energy ( $E_f$ ). First entry (in bold letters) is for  $t\text{-Na}_3\text{SbS}_4$  (cell composition:  $\text{Na}_6\text{Sb}_2\text{S}_8$ ).

| Cell composition |            |           | $E_f$ / eV/atom | Cell composition |      |     | $E_f$ / eV/atom | Cell composition |  |      | $E_f$ / eV/atom |
|------------------|------------|-----------|-----------------|------------------|------|-----|-----------------|------------------|--|------|-----------------|
| <b>Na6</b>       | <b>Sb2</b> | <b>S8</b> | <b>-1.09905</b> | Na8              |      |     | 0.010761        |                  |  | S56  | 0.038013        |
| Na12             | Sb4        | S12       | -1.15974        | Na4              |      |     | 0.003017        |                  |  | S32  | 0.04484         |
| Na2              | S4         | Sb2       | -1.01534        | Na3              |      |     | 0.000231        |                  |  | S88  | 0.028838        |
| Na3              | S4         | Sb1       | -1.09459        | Na2              |      |     | 0               |                  |  | S20  | 0.032116        |
| Na2              | Sb2        | S4        | -0.99488        | Na8              |      |     | 0.069048        |                  |  | S28  | 0.020189        |
| Na8              | Sb8        |           | -0.32833        | Na1              |      |     | 0.000106        |                  |  | S36  | 0.016808        |
| Na6              | Sb2        |           | -0.43777        | Na1              |      |     | 0.002694        |                  |  | S28  | 0.041008        |
| Na4              |            | S2        | -1.19118        | Na1              |      |     | 1.072084        |                  |  | S48  | 0.001343        |
| Na8              |            | S4        | -1.25482        |                  | Sb2  |     | 0.280245        |                  |  | S24  | 0.015913        |
| Na2              |            | S1        | -1.29437        |                  | Sb2  |     | 0.065751        |                  |  | S80  | 0.014414        |
| Na6              |            | S6        | -1.16219        |                  | Sb1  |     | 0.324607        |                  |  | S104 | 0.028873        |
| Na1              |            | S1        | -0.79163        |                  | Sb4  |     | 0.261254        |                  |  | S72  | 0.020778        |
| Na4              |            | S4        | -1.16472        |                  | Sb4  |     | 0.114852        |                  |  | S72  | 0.037362        |
| Na1              |            | S1        | -0.66411        |                  | Sb1  |     | 0.311715        |                  |  | S18  | 0.355           |
|                  | Sb8        | S12       | -0.65163        |                  | Sb1  |     | 0.234278        |                  |  | S4   | 1.122607        |
|                  | Sb8        | S20       | -0.43184        |                  | Sb1  |     | 0.048567        |                  |  | S4   | 0.342059        |
|                  | Sb17       | S27       | -0.58276        |                  | Sb2  |     | 0               |                  |  | S4   | 0.343461        |
|                  | Sb11       | S18       | -0.56467        |                  | Sb14 |     | 0.315406        |                  |  | S6   | 0.06543         |
|                  | Sb2        | S4        | -0.31157        |                  |      | S32 | 0               |                  |  | S1   | 0.621523        |
|                  | Sb2        | S2        | -0.36271        |                  |      | S32 | 0.000961        |                  |  | S4   | 0.509846        |
| Na4              |            |           | 0.128501        |                  |      | S18 | 0.442006        |                  |  | S9   | 0.04123         |
| Na1              |            |           | 0.0026          |                  |      | S8  | 0.010616        |                  |  | S1   | 1.298147        |

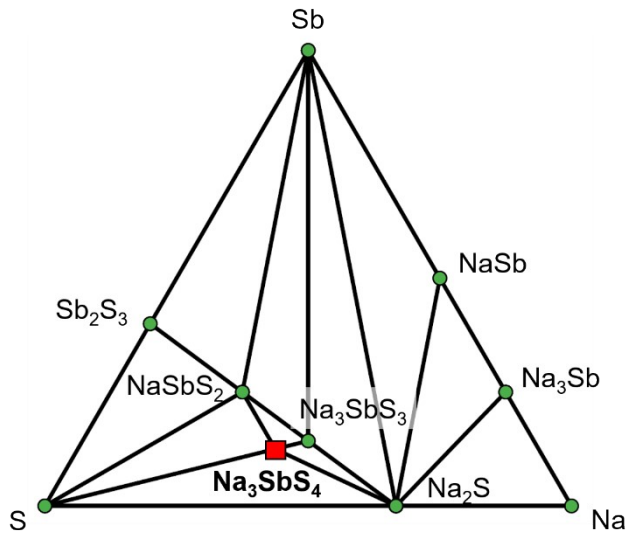

Figure S4. Na-Sb-S thermodynamic phase diagram.  $Na_3SbS_4$  is indicated by a red square.

Table S5. Detailed chemical reactions and critical chemical potentials from grand potential phase diagram analysis for open transition metal (TM) species for different layered-type Na[TM]O<sub>2</sub> (TM = {V, Cr, Mn, Fe, Co, Ni}) cathode compounds. Note:  $\mu_V = 0$ ,  $\mu_{Cr} = 0$ ,  $\mu_{Mn} = 0$ ,  $\mu_{Fe} = 0$ ,  $\mu_{Co} = 0$ , and  $\mu_{Ni} = 0$  are referenced to the chemical potentials of V metal ( $\mu_V^0 = -9.0866$  eV), Cr metal ( $\mu_{Cr}^0 = -9.6367$  eV), Mn metal ( $\mu_{Mn}^0 = -9.1592$  eV), Fe metal ( $\mu_{Fe}^0 = -8.4598$  eV), Co metal ( $\mu_{Co}^0 = -7.1100$  eV), and Ni metal ( $\mu_{Ni}^0 = -5.7811$  eV), respectively.

| Compound                             | Open TM element | Critical reactions ( $\mu_{TM}$ relative to $\mu_{TM}^0$ )                                                                                                                                           |
|--------------------------------------|-----------------|------------------------------------------------------------------------------------------------------------------------------------------------------------------------------------------------------|
| NaVO <sub>2</sub> (@full sodiation)  | V               | NaVO <sub>2</sub> → NaVO <sub>2</sub> (0 eV)<br>NaVO <sub>2</sub> → 0.2222 V <sub>2</sub> O <sub>3</sub> + 0.3333 Na <sub>3</sub> VO <sub>4</sub> + 0.2222 V (-1.7950 eV)                            |
| VO <sub>2</sub> (@full desodiation)  | V               | 2 VO <sub>2</sub> → 2 VO <sub>2</sub> (-3.071 eV)<br>2 VO <sub>2</sub> → 0.5714 V <sub>3</sub> O <sub>7</sub> + 0.2857 V (-4.7314 eV)                                                                |
| NaCrO <sub>2</sub> (@full sodiation) | Cr              | NaCrO <sub>2</sub> → NaCrO <sub>2</sub> (0 eV)<br>NaCrO <sub>2</sub> → 0.5 Na <sub>2</sub> CrO <sub>4</sub> + 0.5 Cr (-4.0055 eV)                                                                    |
| CrO <sub>2</sub> (@full desodiation) | Cr              | 2 CrO <sub>2</sub> → 2 CrO <sub>2</sub> (-4.9986 eV)<br>2 CrO <sub>2</sub> → 0.3333 Cr <sub>5</sub> O <sub>12</sub> + 0.3333 Cr (-5.5896 eV)                                                         |
| NaMnO <sub>2</sub> (@full sodiation) | Mn              | 2 NaMnO <sub>2</sub> → 2 NaMnO <sub>2</sub> (-0.2598 eV)<br>2 NaMnO <sub>2</sub> → 0.75 Na <sub>2</sub> MnO <sub>3</sub> + 0.25 Na <sub>2</sub> Mn <sub>3</sub> O <sub>7</sub> + 0.5 Mn (-3.5522 eV) |
| MnO <sub>2</sub> (@full desodiation) | Mn              | 4 MnO <sub>2</sub> → 4 MnO <sub>2</sub> (-3.9869 eV)<br>4 MnO <sub>2</sub> → 4 O <sub>2</sub> + 4 Mn (-5.4311 eV)                                                                                    |
| NaFeO <sub>2</sub> (@full sodiation) | Fe              | 2 NaFeO <sub>2</sub> → 2 NaFeO <sub>2</sub> (0 eV)<br>2 NaFeO <sub>2</sub> → 2 NaO <sub>2</sub> + 2 Fe (-5.0297 eV)                                                                                  |
| FeO <sub>2</sub> (@full desodiation) | Fe              | 2 FeO <sub>2</sub> + 0.6667 Fe → 1.333 Fe <sub>2</sub> O <sub>3</sub> (-0.9179 eV)<br>2 FeO <sub>2</sub> → 2 O <sub>2</sub> + 2 Fe (-4.7154 eV)                                                      |
| NaCoO <sub>2</sub> (@full sodiation) | Co              | 2 NaCoO <sub>2</sub> → 2 NaCoO <sub>2</sub> (-0.0769 eV)<br>2 NaCoO <sub>2</sub> → 0.4 Na <sub>3</sub> (CoO <sub>2</sub> ) <sub>4</sub> + 0.2 Na <sub>4</sub> CoO <sub>4</sub> + 0.2 Co (-2.7802 eV) |
| CoO <sub>2</sub> (@full desodiation) | Co              | 4 CoO <sub>2</sub> → 4 CoO <sub>2</sub> (-3.0933 eV)<br>4 CoO <sub>2</sub> → 4 O <sub>2</sub> + 4 Co (-3.4132 eV)                                                                                    |
| NaNiO <sub>2</sub> (@full sodiation) | Ni              | 2 NaNiO <sub>2</sub> → 2 NaNiO <sub>2</sub> (-0.3627 eV)<br>2 NaNiO <sub>2</sub> → 2 NaO <sub>2</sub> + 2 Ni (-2.1525 eV)                                                                            |
| NiO <sub>2</sub> (@full desodiation) | Ni              | NiO <sub>2</sub> + 0.5 Ni → 0.5 Ni <sub>3</sub> O <sub>4</sub> (-1.7025 eV)<br>NiO <sub>2</sub> → O <sub>2</sub> + Ni (-1.9185 eV)                                                                   |

Table S6. Detailed chemical reactions and critical chemical potentials from grand potential phase diagram analysis for open transition metal (TM) species for different electrolyte/electrolyte-related compounds. Note:  $\mu_V = 0$ ,  $\mu_{Cr} = 0$ ,  $\mu_{Mn} = 0$ ,  $\mu_{Fe} = 0$ ,  $\mu_{Co} = 0$ , and  $\mu_{Ni} = 0$  are referenced to the chemical potentials of V metal ( $\mu_V^0 = -9.0866$  eV), Cr metal ( $\mu_{Cr}^0 = -9.6367$  eV), Mn metal ( $\mu_{Mn}^0 = -9.1592$  eV), Fe metal ( $\mu_{Fe}^0 = -8.4598$  eV), Co metal ( $\mu_{Co}^0 = -7.1100$  eV), and Ni metal ( $\mu_{Ni}^0 = -5.7811$  eV), respectively.

| Compound                         | Open TM element | Critical reactions ( $\mu_{TM}$ relative to $\mu_{TM}^0$ )                                                                                                                                                                                            |
|----------------------------------|-----------------|-------------------------------------------------------------------------------------------------------------------------------------------------------------------------------------------------------------------------------------------------------|
| Na <sub>3</sub> SbS <sub>4</sub> | V               | 2 Na <sub>3</sub> SbS <sub>4</sub> + 0.8 V → 0.8 Na <sub>3</sub> SbS <sub>3</sub> + 1.2 NaSbS <sub>2</sub> + 0.8 Na <sub>3</sub> VS <sub>4</sub> (-1.5665 eV)<br>2 Na <sub>3</sub> SbS <sub>4</sub> → 2 Na <sub>3</sub> SbS <sub>4</sub> (-3.2691 eV) |
|                                  | Cr              | 2 Na <sub>3</sub> SbS <sub>4</sub> + 1.333 Cr → 1.333 NaCrS <sub>2</sub> + 0.6667 NaSbS <sub>2</sub> + 1.333 Na <sub>3</sub> SbS <sub>3</sub> (-1.0402 eV)<br>2 Na <sub>3</sub> SbS <sub>4</sub> → 2 Na <sub>3</sub> SbS <sub>4</sub> (-2.0617 eV)    |
|                                  | Mn              | 2 Na <sub>3</sub> SbS <sub>4</sub> + Mn → 2 Na <sub>3</sub> SbS <sub>3</sub> + MnS <sub>2</sub> (-0.8262 eV)<br>2 Na <sub>3</sub> SbS <sub>4</sub> → 2 Na <sub>3</sub> SbS <sub>4</sub> (-1.6204 eV)                                                  |
|                                  | Fe              | 2 Na <sub>3</sub> SbS <sub>4</sub> + Fe → 2 Na <sub>3</sub> SbS <sub>3</sub> + FeS <sub>2</sub> (-0.5356 eV)<br>2 Na <sub>3</sub> SbS <sub>4</sub> → 2 Na <sub>3</sub> SbS <sub>4</sub> (-1.4968 eV)                                                  |
|                                  | Co              | 2 Na <sub>3</sub> SbS <sub>4</sub> + Co → CoS <sub>2</sub> + 2 Na <sub>3</sub> SbS <sub>3</sub> (-0.9348 eV)<br>2 Na <sub>3</sub> SbS <sub>4</sub> → 2 Na <sub>3</sub> SbS <sub>4</sub> (-1.0114 eV)                                                  |
|                                  | Ni              | 2 Na <sub>3</sub> SbS <sub>4</sub> + 1.5 Ni → 2 Na <sub>3</sub> SbS <sub>3</sub> + 0.5 Ni <sub>3</sub> S <sub>4</sub> (-0.4050 eV)<br>2 Na <sub>3</sub> SbS <sub>4</sub> → 2 Na <sub>3</sub> SbS <sub>4</sub> (-0.8448 eV)                            |
| Na <sub>3</sub> SbS <sub>3</sub> | V               | 4 Na <sub>3</sub> SbS <sub>3</sub> + 2.4 V → 2.4 Na <sub>3</sub> VS <sub>4</sub> + 2.4 Na <sub>2</sub> S + 4 Sb (-1.0179 eV)<br>4 Na <sub>3</sub> SbS <sub>3</sub> → 4 Na <sub>3</sub> SbS <sub>3</sub> (-1.3927 eV)                                  |
|                                  | Cr              | 4 Na <sub>3</sub> SbS <sub>3</sub> + 4 Cr → 4 NaCrS <sub>2</sub> + 4 Na <sub>2</sub> S + 4 Sb (0 eV)<br>4 Na <sub>3</sub> SbS <sub>3</sub> → 4 Na <sub>3</sub> SbS <sub>3</sub> (-0.8664 eV)                                                          |
|                                  | Mn              | 4 Na <sub>3</sub> SbS <sub>3</sub> + 6 Mn → 2 Na <sub>6</sub> MnS <sub>4</sub> + 4 MnS + 4 Sb (-0.0674 eV)<br>4 Na <sub>3</sub> SbS <sub>3</sub> → 4 Na <sub>3</sub> SbS <sub>3</sub> (-0.4704 eV)                                                    |
|                                  | Fe              | 4 Na <sub>3</sub> SbS <sub>3</sub> + 6 Fe → 2 FeS + 4 FeSbS + 6 Na <sub>2</sub> S (0 eV)<br>4 Na <sub>3</sub> SbS <sub>3</sub> → 4 Na <sub>3</sub> SbS <sub>3</sub> (-0.2034 eV)                                                                      |
|                                  | Co              | 4 Na <sub>3</sub> SbS <sub>3</sub> + 8.083 Co → 0.75 Co <sub>9</sub> S <sub>8</sub> + 1.333 CoSb <sub>3</sub> + 6 Na <sub>2</sub> S (-0.1089 eV)<br>4 Na <sub>3</sub> SbS <sub>3</sub> → 4 Na <sub>3</sub> SbS <sub>3</sub> (-0.2358 eV)              |
|                                  | Ni              | 4 Na <sub>3</sub> SbS <sub>3</sub> + 13 Ni → 3 Ni <sub>3</sub> S <sub>2</sub> + 4 NiSb + 6 Na <sub>2</sub> S (-0.0374 eV)<br>4 Na <sub>3</sub> SbS <sub>3</sub> → 4 Na <sub>3</sub> SbS <sub>3</sub> (-0.1900 eV)                                     |
| NaSbS <sub>2</sub>               | V               | 2 NaSbS <sub>2</sub> + 1.667 V → 0.6667 Na <sub>3</sub> VS <sub>4</sub> + 0.3333 V <sub>3</sub> S <sub>4</sub> + 2 Sb (-1.0179 eV)<br>2 NaSbS <sub>2</sub> → 2 NaSbS <sub>2</sub> (-1.4963 eV)                                                        |
|                                  | Cr              | 2 NaSbS <sub>2</sub> + 2 Cr → 2 NaCrS <sub>2</sub> + 2 Sb (0 eV)                                                                                                                                                                                      |

|                       |    |                                                                                                                                                                                                                  |
|-----------------------|----|------------------------------------------------------------------------------------------------------------------------------------------------------------------------------------------------------------------|
|                       |    | $2 \text{NaSbS}_2 \rightarrow 2 \text{NaSbS}_2$ (-1.0402 eV)                                                                                                                                                     |
|                       | Mn | $2 \text{NaSbS}_2 + 2 \text{Mn} \rightarrow 0.6667 \text{Na}_3\text{SbS}_3 + 2 \text{MnS} + 1.333 \text{Sb}$ (-0.4704 eV)<br>$2 \text{NaSbS}_2 \rightarrow 2 \text{NaSbS}_2$ (-0.5422 eV)                        |
|                       | Fe | $2 \text{NaSbS}_2 + 2 \text{Fe} \rightarrow 0.6667 \text{Na}_3\text{SbS}_3 + 0.6667 \text{FeS} + 1.333 \text{FeSbS}$ (-0.2034 eV)<br>$2 \text{NaSbS}_2 \rightarrow 2 \text{NaSbS}_2$ (-0.3771 eV)                |
|                       | Co | $2 \text{NaSbS}_2 + 2.694 \text{Co} \rightarrow 0.25 \text{Co}_9\text{S}_8 + 0.6667 \text{Na}_3\text{SbS}_3 + 0.4444 \text{CoSb}_3$ (-0.2358 eV)<br>$2 \text{NaSbS}_2 \rightarrow 2 \text{NaSbS}_2$ (-0.3648 eV) |
|                       | Ni | $2 \text{NaSbS}_2 + 4.333 \text{Ni} \rightarrow 0.6667 \text{Na}_3\text{SbS}_3 + \text{Ni}_3\text{S}_2 + 1.333 \text{NiSb}$ (-0.1900 eV)<br>$2 \text{NaSbS}_2 \rightarrow 2 \text{NaSbS}_2$ (-0.2702 eV)         |
| $\text{Na}_2\text{S}$ | V  | $2 \text{Na}_2\text{S} \rightarrow 2 \text{Na}_2\text{S}$ (0 eV)                                                                                                                                                 |
|                       | Cr | $2 \text{Na}_2\text{S} \rightarrow 2 \text{Na}_2\text{S}$ (0 eV)                                                                                                                                                 |
|                       | Mn | $2 \text{Na}_2\text{S} \rightarrow 2 \text{Na}_2\text{S}$ (0 eV)                                                                                                                                                 |
|                       | Fe | $2 \text{Na}_2\text{S} \rightarrow 2 \text{Na}_2\text{S}$ (0 eV)                                                                                                                                                 |
|                       | Co | $2 \text{Na}_2\text{S} \rightarrow 2 \text{Na}_2\text{S}$ (0 eV)                                                                                                                                                 |
|                       | Ni | $2 \text{Na}_2\text{S} \rightarrow 2 \text{Na}_2\text{S}$ (0 eV)                                                                                                                                                 |



Table S7. Detailed chemical reactions and critical chemical potentials from grand potential phase diagram analysis for open X species ( $X = \{O, Sb, S\}$ ) for different layered-type Na[TM]O<sub>2</sub> (TM = {V, Cr, Mn, Fe, Co, Ni}) cathode compounds. Note:  $\mu_O = 0$ ,  $\mu_{Sb} = 0$  and  $\mu_S = 0$  are referenced to the chemical potentials of 1/2O<sub>2</sub> gas ( $\mu_O^0 = -4.9355$  eV), Sb metal ( $\mu_{Sb}^0 = -4.1278$  eV), and S solid ( $\mu_S^0 = -4.1279$  eV), respectively.

| Compound                             | Open X element | Critical reactions ( $\mu_X$ relative to $\mu_X^0$ )                                                                                                                |
|--------------------------------------|----------------|---------------------------------------------------------------------------------------------------------------------------------------------------------------------|
| NaVO <sub>2</sub> (@full sodiation)  | O              | NaVO <sub>2</sub> → NaVO <sub>2</sub> (-3.0210 eV)<br>NaVO <sub>2</sub> → V + Na + O <sub>2</sub> (-4.6840 eV)                                                      |
|                                      | Sb             | NaVO <sub>2</sub> → NaVO <sub>2</sub> (0 eV)                                                                                                                        |
|                                      | S              | NaVO <sub>2</sub> → NaVO <sub>2</sub> (-1.1630 eV)                                                                                                                  |
| VO <sub>2</sub> (@full desodiation)  | O              | 2 VO <sub>2</sub> → 2 VO <sub>2</sub> (-1.3608 eV)<br>2 VO <sub>2</sub> → 0.6667 V <sub>3</sub> O <sub>5</sub> + 0.3333 O <sub>2</sub> (-2.1908 eV)                 |
|                                      | Sb             | 2 VO <sub>2</sub> → 2 VO <sub>2</sub> (-1.5958 eV)                                                                                                                  |
|                                      | S              | 2 VO <sub>2</sub> → 2 VO <sub>2</sub> (-1.7449 eV)                                                                                                                  |
| NaCrO <sub>2</sub> (@full sodiation) | O              | NaCrO <sub>2</sub> → NaCrO <sub>2</sub> (-1.2456 eV)<br>NaCrO <sub>2</sub> → Cr + Na + O <sub>2</sub> (-4.5194 eV)                                                  |
|                                      | Sb             | NaCrO <sub>2</sub> → NaCrO <sub>2</sub> (0 eV)                                                                                                                      |
|                                      | S              | NaCrO <sub>2</sub> → NaCrO <sub>2</sub> (-1.0065 eV)                                                                                                                |
| CrO <sub>2</sub> (@full desodiation) | O              | 2 CrO <sub>2</sub> → 2 CrO <sub>2</sub> (-0.2880 eV)<br>2 CrO <sub>2</sub> → Cr <sub>2</sub> O <sub>3</sub> + 0.5 O <sub>2</sub> (-0.5836 eV)                       |
|                                      | Sb             | 2 CrO <sub>2</sub> → 2 CrO <sub>2</sub> (-5.4118 eV)                                                                                                                |
|                                      | S              | 2 CrO <sub>2</sub> → 2 CrO <sub>2</sub> (-6.4591 eV)                                                                                                                |
| NaMnO <sub>2</sub> (@full sodiation) | O              | 2 NaMnO <sub>2</sub> → 2 NaMnO <sub>2</sub> (-1.1808 eV)<br>2 NaMnO <sub>2</sub> → Na <sub>2</sub> Mn <sub>2</sub> O <sub>3</sub> + 0.5 O <sub>2</sub> (-3.7410 eV) |
|                                      | Sb             | 2 NaMnO <sub>2</sub> → 2 NaMnO <sub>2</sub> (-0.7291 eV)                                                                                                            |
|                                      | S              | 2 NaMnO <sub>2</sub> → 2 NaMnO <sub>2</sub> (-1.8060 eV)                                                                                                            |
| MnO <sub>2</sub> (@full desodiation) | O              | 4 MnO <sub>2</sub> → 4 MnO <sub>2</sub> (0 eV)<br>4 MnO <sub>2</sub> → 2 Mn <sub>2</sub> O <sub>3</sub> + O <sub>2</sub> (-0.7220 eV)                               |
|                                      | Sb             | 4 MnO <sub>2</sub> → 4 MnO <sub>2</sub> (-4.8282 eV)                                                                                                                |
|                                      | S              | 4 MnO <sub>2</sub> → 4 MnO <sub>2</sub> (-6.1673 eV)                                                                                                                |
| NaFeO <sub>2</sub> (@full sodiation) | O              | 2 NaFeO <sub>2</sub> → 2 NaFeO <sub>2</sub> (0 eV)<br>2 NaFeO <sub>2</sub> → 0.6667 Na <sub>3</sub> FeO <sub>3</sub> + 1.333 Fe + O <sub>2</sub> (-3.6000 eV)       |
|                                      | Sb             | 2 NaFeO <sub>2</sub> → 2 NaFeO <sub>2</sub> (0 eV)                                                                                                                  |
|                                      | S              | 2 NaFeO <sub>2</sub> → 2 NaFeO <sub>2</sub> (-1.3806 eV)                                                                                                            |

|                                      |    |                                                                                                                                                                             |
|--------------------------------------|----|-----------------------------------------------------------------------------------------------------------------------------------------------------------------------------|
| FeO <sub>2</sub> (@full desodiation) | O  | 2 FeO <sub>2</sub> → 2 Fe + 2 O <sub>2</sub> (-3.3572 eV)                                                                                                                   |
|                                      | Sb | 2 FeO <sub>2</sub> → Fe <sub>2</sub> O <sub>3</sub> + 0.5 O <sub>2</sub> (-6.8397 eV)                                                                                       |
|                                      | S  | 2 FeO <sub>2</sub> → Fe <sub>2</sub> O <sub>3</sub> + 0.5 O <sub>2</sub> (-8.3005 eV)                                                                                       |
| NaCoO <sub>2</sub> (@full sodiation) | O  | 2 NaCoO <sub>2</sub> → 2 NaCoO <sub>2</sub> (-0.6634 eV)<br>2 NaCoO <sub>2</sub> → 1.333 CoO + 0.6667 Na <sub>3</sub> CoO <sub>3</sub> + 0.3333 O <sub>2</sub> (-2.5832 eV) |
|                                      | Sb | 2 NaCoO <sub>2</sub> → 2 NaCoO <sub>2</sub> (-2.7485 eV)                                                                                                                    |
|                                      | S  | 2 NaCoO <sub>2</sub> → 2 NaCoO <sub>2</sub> (-3.6036 eV)                                                                                                                    |
| CoO <sub>2</sub> (@full desodiation) | O  | 4 CoO <sub>2</sub> → 4 CoO <sub>2</sub> (0 eV)<br>4 CoO <sub>2</sub> → 1.333 Co <sub>3</sub> O <sub>4</sub> + 1.333 O <sub>2</sub> (-0.1600 eV)                             |
|                                      | Sb | 4 CoO <sub>2</sub> → 4 CoO <sub>2</sub> (-6.2564 eV)                                                                                                                        |
|                                      | S  | 4 CoO <sub>2</sub> → 4 CoO <sub>2</sub> (-7.5514 eV)                                                                                                                        |
| NaNiO <sub>2</sub> (@full sodiation) | O  | 2 NaNiO <sub>2</sub> → 2 NaNiO <sub>2</sub> (-0.0040 eV)<br>2 NaNiO <sub>2</sub> → 0.4 Na <sub>5</sub> NiO <sub>4</sub> + 1.6 NiO + 0.4 O <sub>2</sub> (-1.5018 eV)         |
|                                      | Sb | 2 NaNiO <sub>2</sub> → 2 NaNiO <sub>2</sub> (-6.1942 eV)                                                                                                                    |
|                                      | S  | 2 NaNiO <sub>2</sub> → 2 NaNiO <sub>2</sub> (-7.3372 eV)                                                                                                                    |
| NiO <sub>2</sub> (@full desodiation) | O  | NiO <sub>2</sub> → Ni + O <sub>2</sub> (-3.7290 eV)                                                                                                                         |
|                                      | Sb | NiO <sub>2</sub> → 0.3333 Ni <sub>3</sub> O <sub>4</sub> + 0.3333 O <sub>2</sub> (-6.8918 eV)                                                                               |
|                                      | S  | NiO <sub>2</sub> → 0.3333 Ni <sub>3</sub> O <sub>4</sub> + 0.3333 O <sub>2</sub> (-8.4912 eV)                                                                               |

Table S8. Detailed chemical reactions and critical chemical potentials from grand potential phase diagram analysis for open X species ( $X = \{O, Sb, S\}$ ) for different electrolyte/electrolyte-related compounds. Note:  $\mu_O = 0$ ,  $\mu_{Sb} = 0$  and  $\mu_S = 0$  are referenced to the chemical potentials of  $1/2O_2$  gas ( $\mu_O^0 = -4.9355$  eV), Sb metal ( $\mu_{Sb}^0 = -4.1278$  eV), and S solid ( $\mu_S^0 = -4.1279$  eV), respectively.

| Compound    | Open X element | Critical reactions ( $\mu_X$ relative to $\mu_X^0$ )                                                                      |
|-------------|----------------|---------------------------------------------------------------------------------------------------------------------------|
| $Na_3SbS_4$ | O              | $2 Na_3SbS_4 \rightarrow 2 Na_3SbS_4$ (-3.0102 eV)                                                                        |
|             | Sb             | $2 Na_3SbS_4 \rightarrow 2 Na_3SbS_4$ (-1.0216 eV)<br>$2 Na_3SbS_4 \rightarrow 3 Na_2S + 5 S + 2 Sb$ (-2.9677 eV)         |
|             | S              | $2 Na_3SbS_4 \rightarrow 2 Na_3SbS_4$ (0 eV)<br>$2 Na_3SbS_4 \rightarrow 2 Na_3SbS_3 + 2 S$ (-0.6742 eV)                  |
| $Na_3SbS_3$ | O              | $4 Na_3SbS_3 \rightarrow 4 Na_3SbS_3$ (-3.0512 eV)                                                                        |
|             | Sb             | $4 Na_3SbS_3 \rightarrow 4 Na_3SbS_3$ (0 eV)<br>$4 Na_3SbS_3 \rightarrow 2.4 Na_3SbS_4 + 2.4 Na_2S + 1.6 Sb$ (-1.2822 eV) |
|             | S              | $4 Na_3SbS_3 \rightarrow 4 Na_3SbS_3$ (-0.6742 eV)<br>$4 Na_3SbS_3 \rightarrow 6 Na_2S + 4 Sb + 6 S$ (-1.5290 eV)         |
| $NaSbS_2$   | O              | $2 NaSbS_2 \rightarrow 2 NaSbS_2$ (-2.8492 eV)                                                                            |
|             | Sb             | $2 NaSbS_2 \rightarrow 2 NaSbS_2$ (0 eV)<br>$2 NaSbS_2 \rightarrow 0.6667 Na_3SbS_4 + 1.333 S + 1.333 Sb$ (-1.6958 eV)    |
|             | S              | $2 NaSbS_2 \rightarrow 2 NaSbS_2$ (0 eV)<br>$2 NaSbS_2 \rightarrow 0.6667 NaSbS_2 + 1.333 Sb + 2 S$ (-1.3553 eV)          |
| $Na_2S$     | O              | $2 Na_2S \rightarrow 2 Na_2S$ (-3.0946 eV)                                                                                |
|             | Sb             | $2 Na_2S \rightarrow 2 Na_2S$ (0 eV)                                                                                      |
|             | S              | $2 Na_2S \rightarrow 2 Na_2S$ (0 eV)<br>$2 Na_2S \rightarrow 4 Na + 2 S$ (-3.8831 eV)                                     |

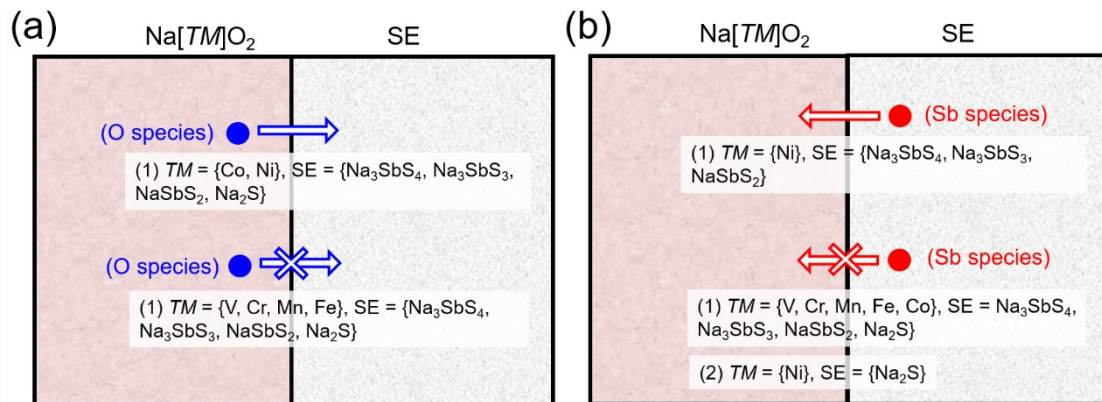

Figure S5. a-b) Schematic illustration summary for  $X = \{O, Sb, S\}$  species tendency to migrate across the Na[*TM*]O<sub>2</sub>-SE interface (SE: solid electrolyte).

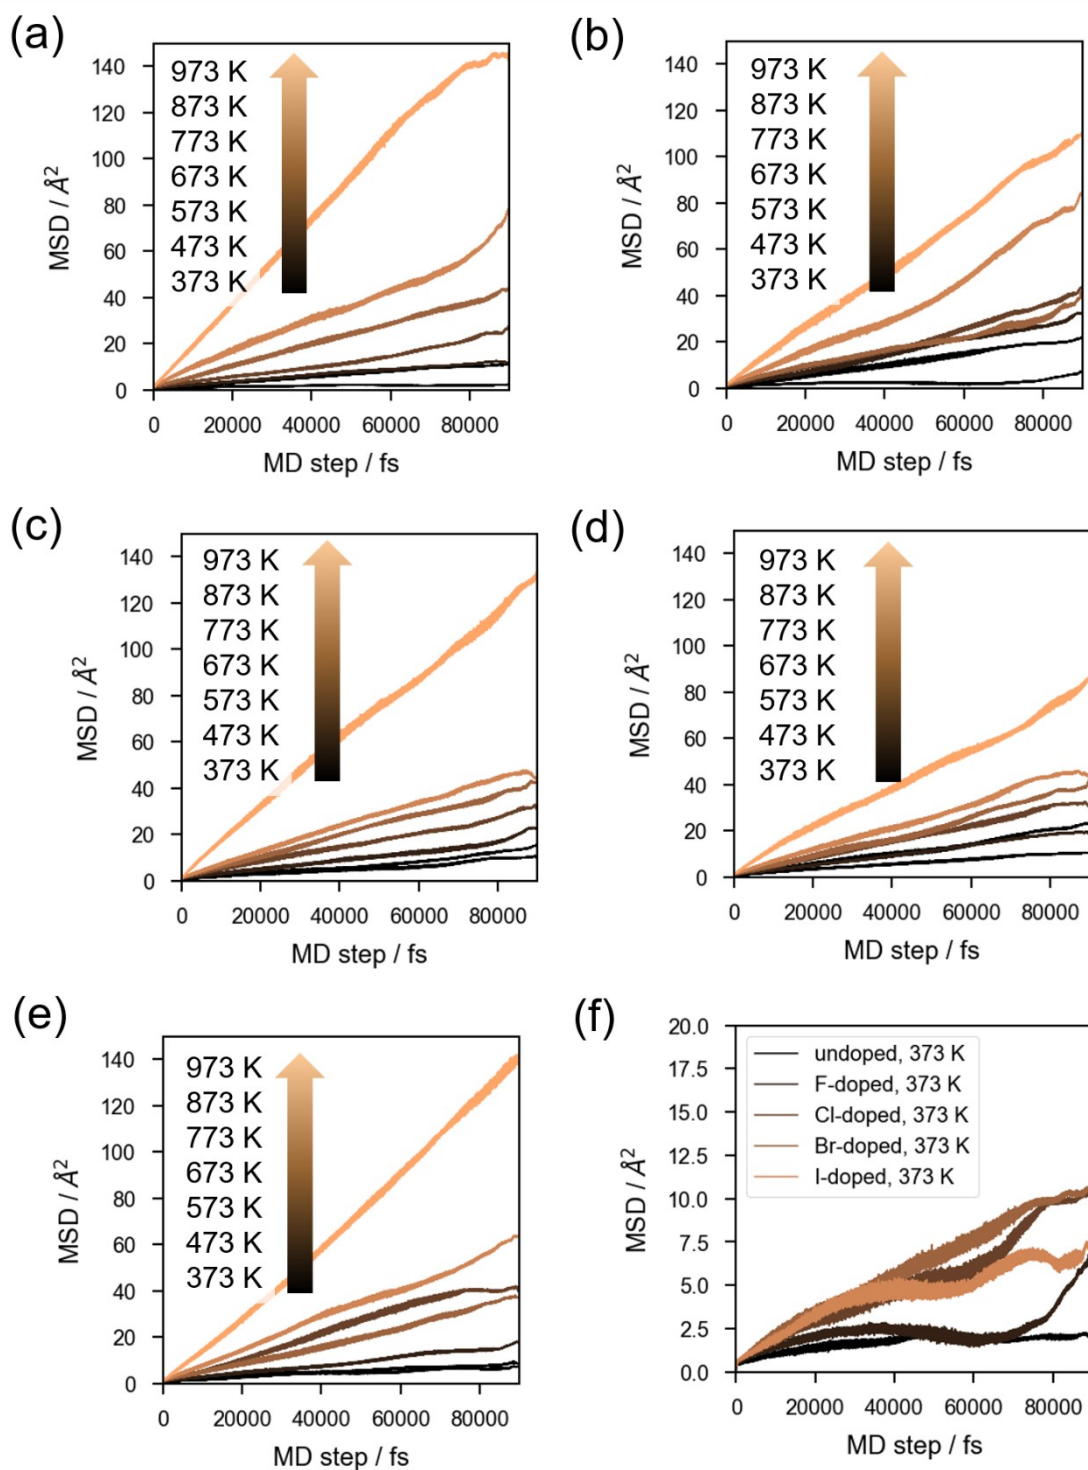

Figure S6. Mean square displacement ( $MSD$ ) plots derived from DFT-MD calculations: a) 1-vacancy undoped (1v-u), b) 2-vacancy F-doped (2v-F), c) 2-vacancy Cl-doped (2v-Cl), d) 2-vacancy Br-doped (2v-Br), e) 2-vacancy I-doped (2v-I) model, and f) highlighted MSD plots at 373-K for a-e.

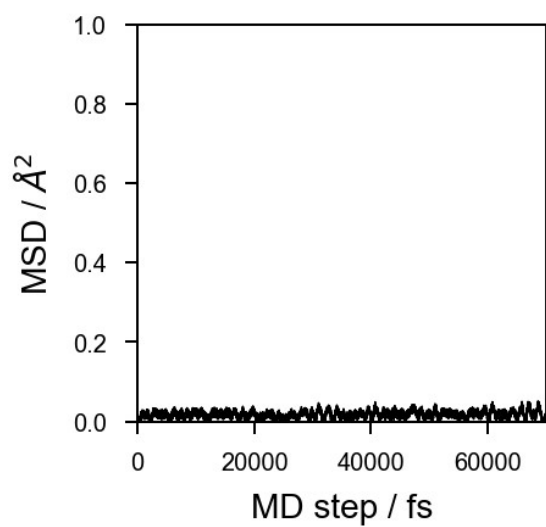

Figure S7. Li-atom mean square displacement ( $MSD$ ) plot of c-NSS from DFT-MD calculation under NVT ensemble condition at 473 K.

### Diffusion barrier calculation

Nudged elastic band (NEB) supercell ( $2 \times 2 \times 2$ ) method was used to estimate ion diffusion barrier values.<sup>59</sup> For the Na local pathway, 7 intermediate images were interpolated linearly between fully optimized initial and final structure coordinate data. Energy barriers were then obtained in the dilute vacancy limit (or one vacancy/supercell) with cell edges of at least 14 Å.

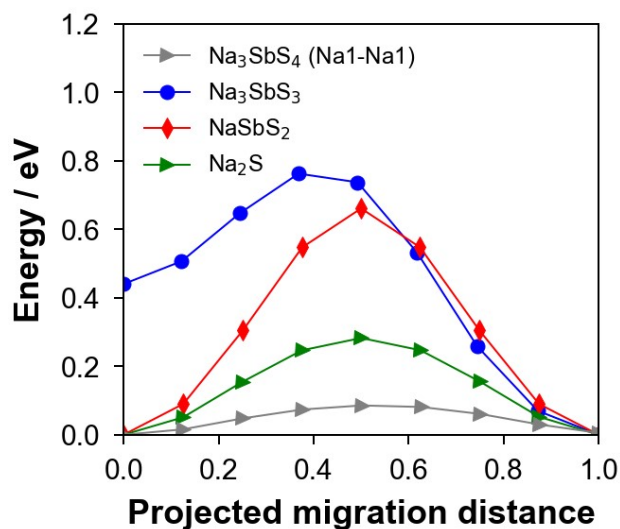

Figure S8. DFT-NEB Na ion migration energy comparison for Na1-Na1 pathway for Na<sub>3</sub>SbS<sub>4</sub> and related compounds.

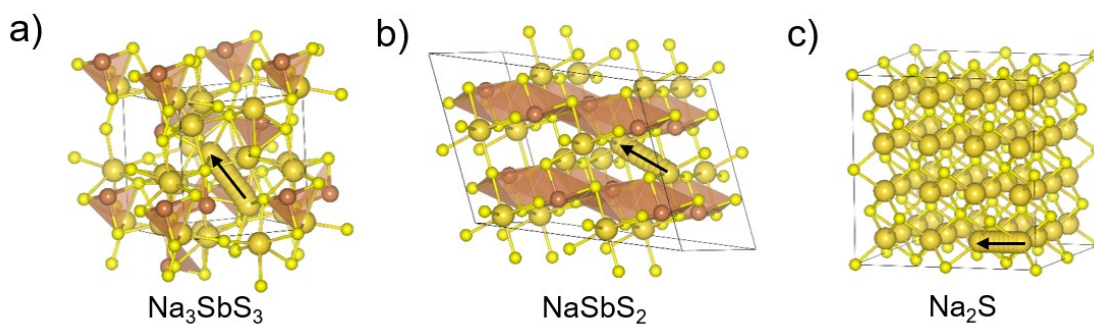

Figure S9. Visualization of local Na pathways calculated by DFT-NEB for SE-related compounds: a) Na<sub>3</sub>SbS<sub>3</sub>, b) NaSbS<sub>2</sub>, c) Na<sub>2</sub>S.

Table S9. Summary of DFT-predicted decomposition reactions related to voltage stability window for Na with Cl-doped Na<sub>3</sub>SbS<sub>4</sub>.

| <b>Voltage (V vs. Na/Na<sup>+</sup>)</b> | <b>Decomposition reaction</b>                                                                                                                                           |
|------------------------------------------|-------------------------------------------------------------------------------------------------------------------------------------------------------------------------|
| 0                                        | $2\text{Na}_{23}\text{Sb}_8\text{S}_{31}\text{Cl} + 128\text{Na} \rightarrow 16\text{Na}_3\text{Sb} + 62\text{Na}_2\text{S} + 2\text{NaCl}$                             |
| 0.53                                     | $2\text{Na}_{23}\text{Sb}_8\text{S}_{31}\text{Cl} + 96\text{Na} \rightarrow 16\text{NaSb} + 62\text{Na}_2\text{S} + 2\text{NaCl}$                                       |
| 0.65                                     | $2\text{Na}_{23}\text{Sb}_8\text{S}_{31}\text{Cl} + 80\text{Na} \rightarrow 62\text{Na}_2\text{S} + 2\text{NaCl} + 16\text{Sb}$                                         |
| 1.17                                     | $2\text{Na}_{23}\text{Sb}_8\text{S}_{31}\text{Cl} + 32\text{Na} \rightarrow 16\text{Na}_3\text{SbS}_3 + 14\text{Na}_2\text{S} + 2\text{NaCl}$                           |
| 1.54                                     | $2\text{Na}_{23}\text{Sb}_8\text{S}_{31}\text{Cl} + 18\text{Na} \rightarrow 14\text{NaS} + 16\text{Na}_3\text{SbS}_3 + 2\text{NaCl}$                                    |
| 1.56                                     | $2\text{Na}_{23}\text{Sb}_8\text{S}_{31}\text{Cl} + 11\text{Na} \rightarrow 7\text{NaS}_2 + 16\text{Na}_3\text{SbS}_3 + 2\text{NaCl}$                                   |
| 1.65                                     | $2\text{Na}_{23}\text{Sb}_8\text{S}_{31}\text{Cl} \rightarrow 15\text{NaS}_2 + 16\text{NaSbS}_2 + 2\text{NaCl} + 13\text{Na}$                                           |
| 1.82                                     | $2\text{Na}_{23}\text{Sb}_8\text{S}_{31}\text{Cl} \rightarrow 16\text{NaSbS}_2 + 6\text{Na}_2\text{S}_5 + 2\text{NaCl} + 16\text{Na}$                                   |
| 2.18                                     | $2\text{Na}_{23}\text{Sb}_8\text{S}_{31}\text{Cl} \rightarrow 7.6\text{Na}_2\text{S}_5 + 8\text{Sb}_2\text{S}_3 + 2\text{NaCl} + 28.8\text{Na}$                         |
| 2.22                                     | $2\text{Na}_{23}\text{Sb}_8\text{S}_{31}\text{Cl} \rightarrow 6.733\text{Na}_2\text{S}_5 + 7.667\text{Sb}_2\text{S}_3 + 0.6667\text{SbS}_8\text{Cl}_3 + 32.53\text{Na}$ |
| 3.38                                     | $2\text{Na}_{23}\text{Sb}_8\text{S}_{31}\text{Cl} \rightarrow 7.667\text{Sb}_2\text{S}_3 + 0.6667\text{SbS}_8\text{Cl}_3 + 33.67\text{S} + 46\text{Na}$                 |
